# Supplementary material
Source: PubMed Central journal article supplement (PMC6711365)
Supplement: NIHMS1534419-supplement-2.pdf [file NIHMS1534419-supplement-2.pdf]

**Supplemental Table.** Unadjusted odds ratio for (A) ASCVD, (B) coronary artery disease (CAD or AMI), (C) peripheral artery disease, and (D) cerebrovascular disease (CVA or TIA) by age decile and sex in adults with and without Systemic Lupus Erythematosus hospitalized in the United States between 2008-2014.

**Supplemental Table 1A – Unadjusted odds ratio for ASCVD**

| Age Group | Women               |        | Men              |        |
|-----------|---------------------|--------|------------------|--------|
|           | SLE                 | No SLE | SLE              | No SLE |
|           | (95% CI)            |        | (95% CI)         |        |
| 20-29     | 12.44 (11.13-13.91) | 1      | 4.05 (3.33-4.93) | 1      |
| 30-39     | 4.62 (4.38-4.87)    | 1      | 3.42 (3.05-3.85) | 1      |
| 40-49     | 1.95 (1.89-2.01)    | 1      | 1.98 (1.84-2.14) | 1      |
| 50-59     | 1.46 (1.43-1.50)    | 1      | 1.40 (1.31-1.49) | 1      |
| 60-69     | 1.29 (1.26-1.32)    | 1      | 1.25 (1.18-1.34) | 1      |
| 70-79     | 1.18 (1.14-1.21)    | 1      | 1.12 (1.04-1.22) | 1      |
| 80-89     | 1.21 (1.16-1.27)    | 1      | 1.14 (1.02-1.29) | 1      |

**Supplemental Table 1B – Unadjusted odds ratio for CAD**

| Age Group | Women               |        | Men              |        |
|-----------|---------------------|--------|------------------|--------|
|           | SLE                 | No SLE | SLE              | No SLE |
|           | (95% CI)            |        | (95% CI)         |        |
| 20-29     | 14.46 (11.92-17.56) | 1      | 3.50 (2.62-4.66) | 1      |
| 30-39     | 3.70 (3.43-3.99)    | 1      | 3.02 (2.62-3.49) | 1      |
| 40-49     | 1.69 (1.63-1.76)    | 1      | 1.76 (1.61-1.92) | 1      |
| 50-59     | 1.32 (1.29-1.36)    | 1      | 1.25 (1.17-1.34) | 1      |
| 60-69     | 1.23 (1.20-1.27)    | 1      | 1.17 (1.09-1.25) | 1      |
| 70-79     | 1.13 (1.09-1.17)    | 1      | 1.09 (1.01-1.18) | 1      |
| 80-89     | 1.20 (1.15-1.26)    | 1      | 1.15 (1.03-1.29) | 1      |

**Supplemental Table 1C – Unadjusted odds ratio for PAD**

|           | <b>Women</b>        |               | <b>Men</b>          |               |
|-----------|---------------------|---------------|---------------------|---------------|
|           | <b>SLE (95% CI)</b> | <b>No SLE</b> | <b>SLE (95% CI)</b> | <b>No SLE</b> |
| Age Group |                     |               |                     |               |
| 20-29     | 9.06 (6.80-12.08)   | 1             | 5.15 (3.07-8.63)    | 1             |
| 30-39     | 3.51 (3.08-4.01)    | 1             | 3.12 (2.30-4.24)    | 1             |
| 40-49     | 1.78 (1.65-1.92)    | 1             | 1.90 (1.58-2.28)    | 1             |
| 50-59     | 1.27 (1.20-1.33)    | 1             | 1.46 (1.30-1.64)    | 1             |
| 60-69     | 1.07 (1.02-1.18)    | 1             | 1.19 (1.07-1.33)    | 1             |
| 70-79     | 1.08 (1.02-1.13)    | 1             | 1.15 (1.02-1.30)    | 1             |
| 80-89     | 1.17 (1.08-1.26)    | 1             | 1.05 (0.88-1.27)    | 1             |

**Supplemental Table 1D – Unadjusted odds ratio for CVD**

|           | <b>Women</b>        |               | <b>Men</b>          |               |
|-----------|---------------------|---------------|---------------------|---------------|
|           | <b>SLE (95% CI)</b> | <b>No SLE</b> | <b>SLE (95% CI)</b> | <b>No SLE</b> |
| Age Group |                     |               |                     |               |
| 20-29     | 12.09 (10.43-14.01) | 1             | 4.37 (3.29-5.81)    | 1             |
| 30-39     | 5.97 (5.50-6.49)    | 1             | 4.01 (3.26-4.94)    | 1             |
| 40-49     | 2.35 (2.23-2.47)    | 1             | 2.52 (2.19-2.91)    | 1             |
| 50-59     | 1.69 (1.62-1.76)    | 1             | 1.61 (1.44-1.80)    | 1             |
| 60-69     | 1.37 (1.31-1.42)    | 1             | 1.38 (1.23-1.54)    | 1             |
| 70-79     | 1.16 (1.11-1.22)    | 1             | 1.08 (0.95-1.23)    | 1             |
| 80-89     | 1.04 (0.98-1.12)    | 1             | 0.94 (0.79-1.13)    | 1             |
