# Supplementary material
Source: PubMed Central journal article supplement (PMC6711365)
Supplement: NIHMS1534419-supplement-3.pdf [file NIHMS1534419-supplement-3.pdf]

## **Supplemental Appendix:**

### Coronary Artery Disease ICD Codes:

ICD-9 410.01, 410.11, 410.21, 410.31, 410.41, 410.51, 410.61, 410.71, 410.81, 410.91, 411, 411.0, 411.1, 411.81, 412, 413, 413.0, 413.1, 413.9, 414, 414.0, 414.00, 414.01, 414.02, 414.03, 414.04, 414.05, 414.2, 414.3, 414.4, 414.8, 414.9, V45.81, V45.82

### Peripheral Artery Disease ICD Codes:

ICD-9 440.0, 440.2, 440.20, 440.21, 440.22, 440.23, 440.24, 440.3, 440.30, 440.31, 440.32, 440.4, 440.9, 443.9, 444.0, 444.2, 444.22, 444.8, 444.81, 447.1, 445.0, 445.02, CCS 114

### Cerebrovascular Disease ICD Codes:

ICD-9 433, 433.01, 433.1, 433.11, 433.2, 433.21, 433.3, 433.31, 433.8, 433.81, 433.9, 433.91, 434, 434.0, 434.01, 434.1, 434.11, 434.9, 434.91, 436, 437.1, V12.54

### ASCVD ICD Codes: Any CAD, PAD, or CVD

### Chronic Kidney Disease ICD Codes:

585, 585.1, 585.2, 585.3, 585.4, 585.5, 585.6, 585.9, 792.5, V420, V45.1, V45.11, V45.12, V56.0, V56.1, V56.2, V56.31, V56.32, V56.8.
